# Supplementary material for: Structure, hydrogen bond dynamics and phase transition in a model ionic liquid electrolyte
Source: Royal Society of Chemistry journal article supplement (doi:10.1039/d2cp00452f), 2022-01-01
Supplement: d2cp00452f1.pdf [file d2cp00452f1.pdf]

## Electronic Supplementary Information

### Structure, hydrogen bond dynamics and phase transition in a model ionic liquid electrolyte.

Alexander E. Khudozhitkov<sup>a,d</sup>, Peter Stange<sup>b</sup>, Alexander G. Stepanov<sup>a</sup>, Daniil I. Kolokolov<sup>a,d,\*</sup>,  
Ralf Ludwig<sup>b,c,\*</sup>

a Boreskov Institute of Catalysis, Siberian Branch of Russian Academy of Sciences, Prospekt Akademika Lavrentieva 5, Novosibirsk 630090, Russia; E-mail: [kdi@catalysis.ru](mailto:kdi@catalysis.ru)

b Universität Rostock, Institut für Chemie, Abteilung für Physikalische Chemie, Dr.-Lorenz-Weg 2, 18059 Rostock, Germany; Tel: 49 381 498 6517; E-mail: [ralf.ludwig@uni-rostock.de](mailto:ralf.ludwig@uni-rostock.de)

c Leibniz-Institut für Katalyse an der Universität Rostock e.V., Albert-Einstein-Str. 29a, 18059 Rostock (Germany)

d Novosibirsk State University, Pirogova Street 2, Novosibirsk 630090, Russia

# NMR of [TEA][NTf<sub>2</sub>]

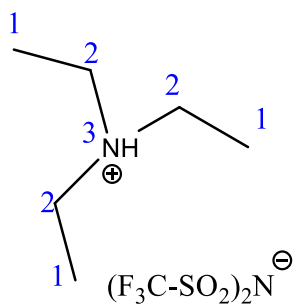

| N° | δ(ppm) | Signal | Integration |
|----|--------|--------|-------------|
| 3  | 8.84   | S      | 1           |
| 2  | 3.10   | Q      | 6           |
| 1  | 1.17   | T      | 9           |

**Solid state NMR spectra of [TEA][NTf<sub>2</sub>], [TEA][OTf] and [TEA][OMs]**

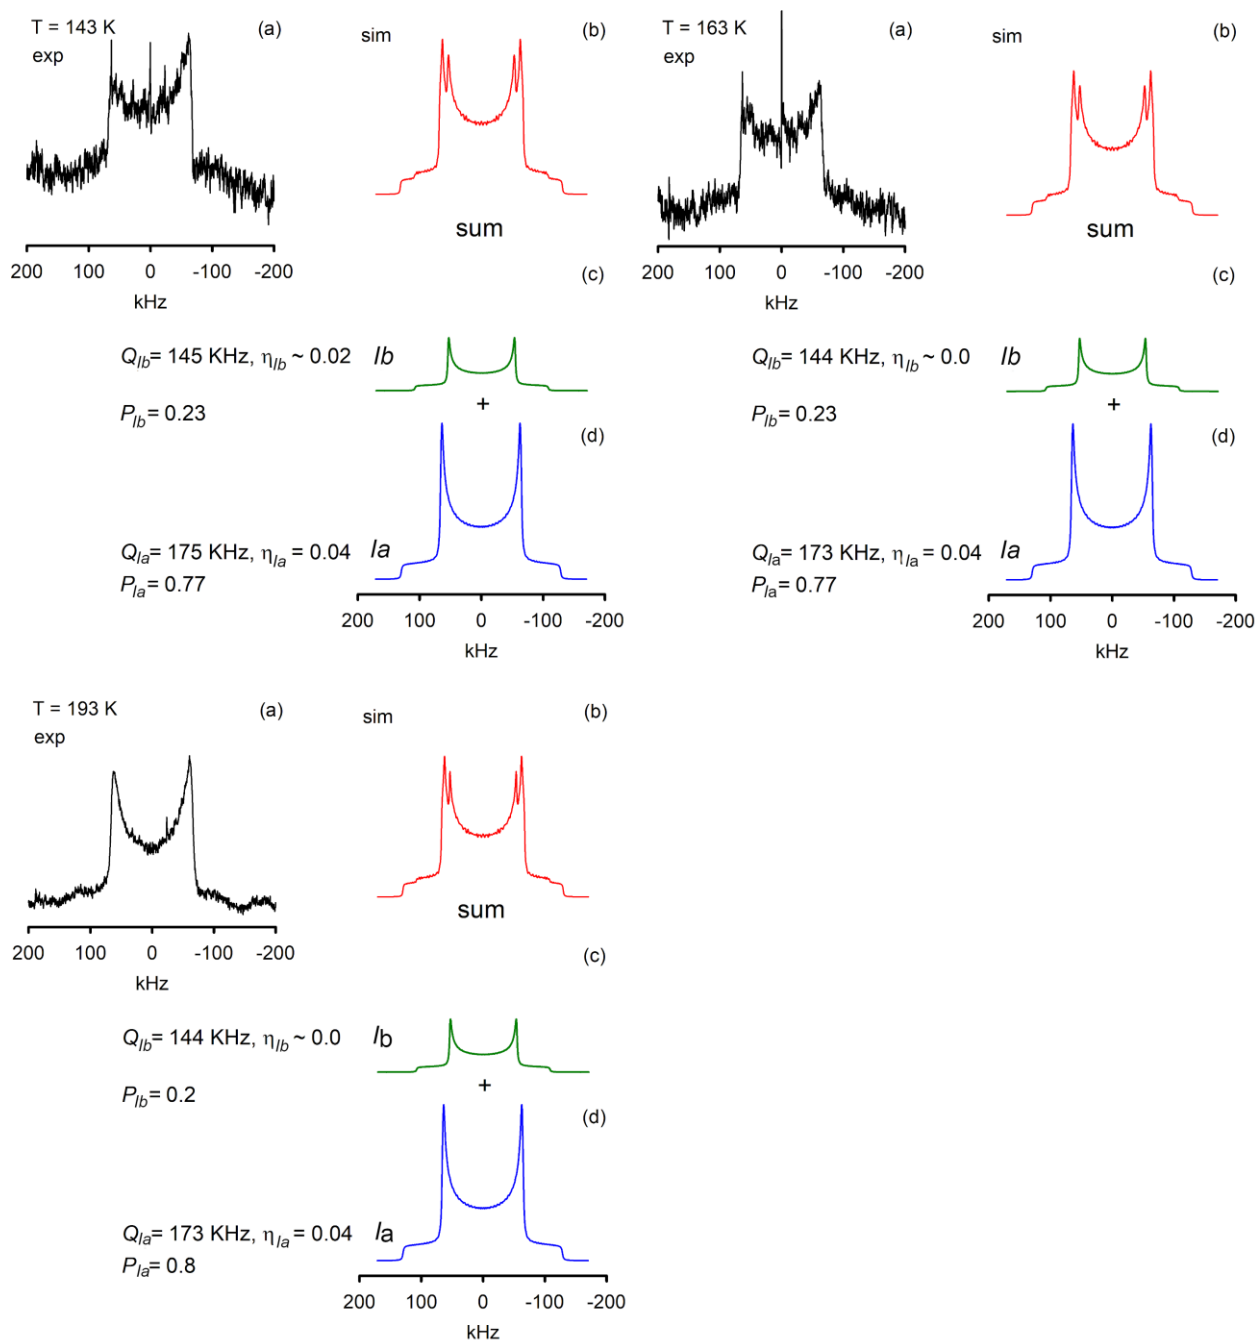

**Figure S1.** <sup>2</sup>H NMR spectra of [TEA][NTf<sub>2</sub>] at 143 K, 163 K and 193 K: For each temperature we show the (a) experimental, (b) simulated and (c-d) the deconvoluted spectra.

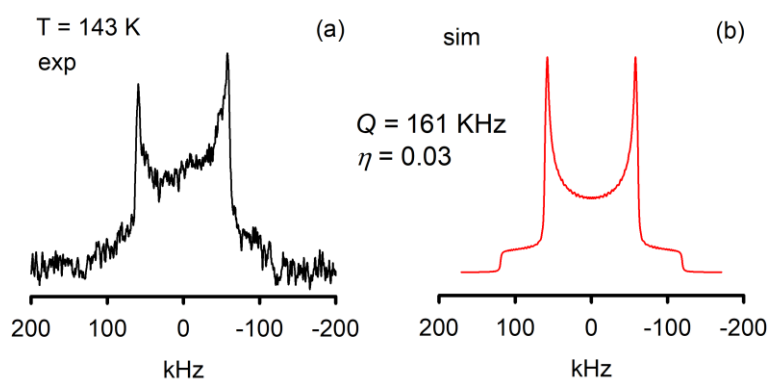

**Figure S2.**  $^2\text{H}$  NMR spectra of [TEA][OTf] at 143 K: (a) experimental, (b) simulated spectra.

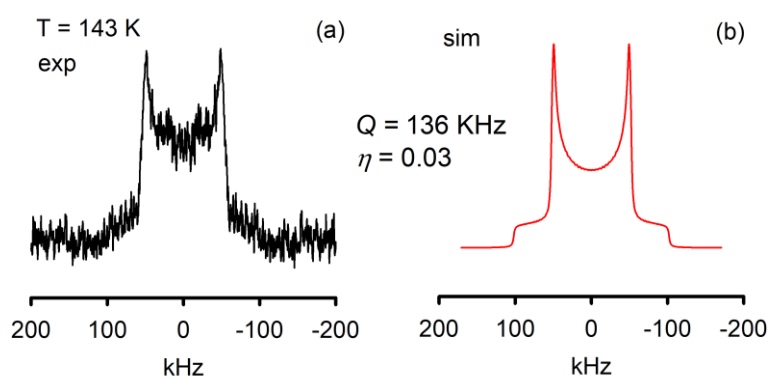

**Figure S3.**  $^2\text{H}$  NMR spectra of [TEA][OMs] at 143 K: (a) experimental, (b) simulated spectra.

### DSC profiles of [TEA][NTf<sub>2</sub>], [TEA][OTf] and [TEA][OMs]

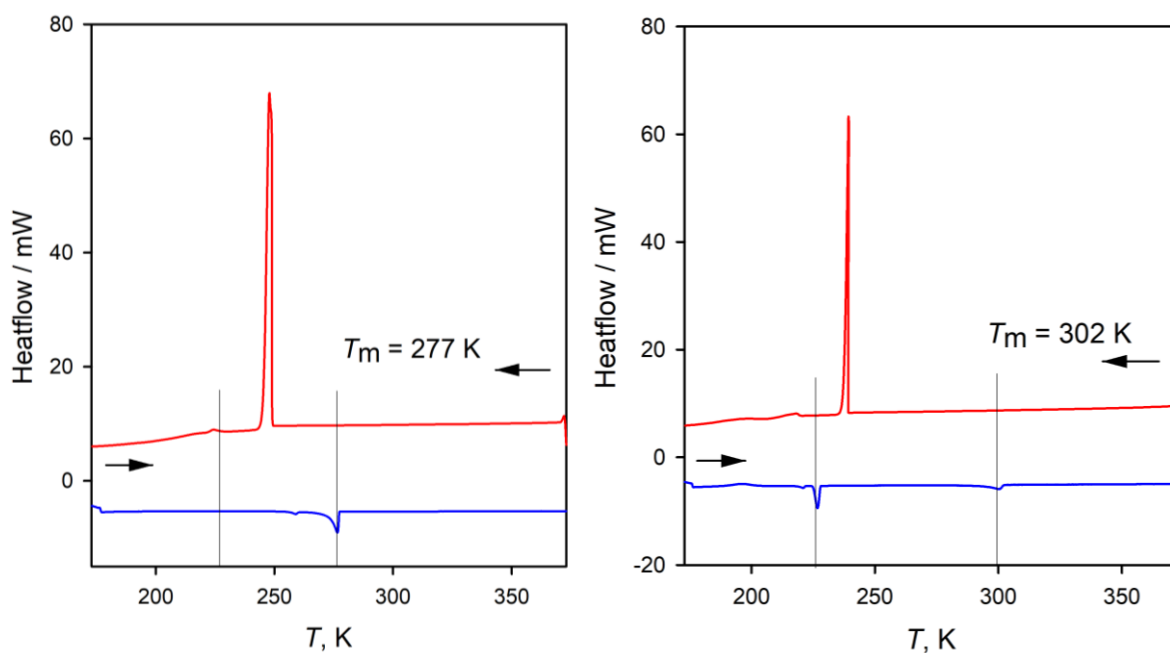

**Figure S4** The DSC profile for [TEA][NTf<sub>2</sub>] (left) and [TEA][OTf] samples: the heating rate was 1 K·min<sup>-1</sup>.

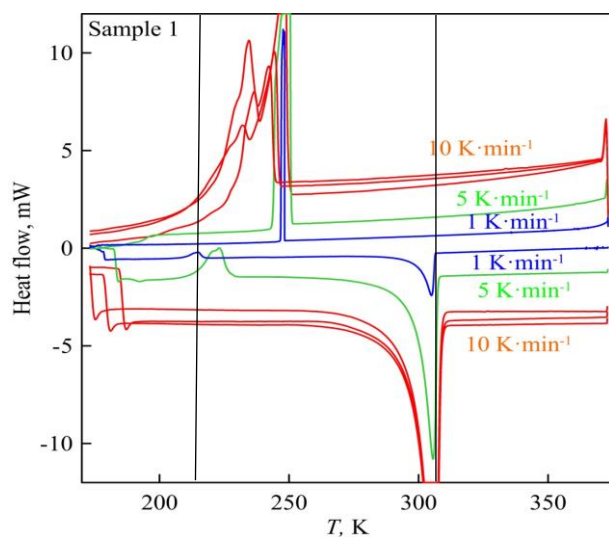

**Figure S5.** The DSC profile for [TEA][OMS] samples; blue line is cooling and heating with 1 K·min<sup>-1</sup>, green lines corresponds to cooling and heating with 5 K·min<sup>-1</sup>, red line - 10 K·min<sup>-1</sup>. The curves with the same heating or cooling rate are shifted for 0.1 mW for better illustration.
